# Supplementary material
Source: PubMed Central journal article supplement (PMC5963940)
Supplement: NIHMS967866-supplement-SI.pdf [file NIHMS967866-supplement-SI.pdf]

# BindProfX: Assessing mutation-induced binding affinity change by protein interface profiles with pseudo counts

Peng Xiong, Chengxin Zhang, Wei Zheng, Yang Zhang

## Supplementary Material

**Table S1.** Probability transition matrix (iPTM) from interface structure alignments.

|   | A     | C     | D     | E     | F     | G     | H     | I     | K     | L     | M     | N     | P     | Q     | R     | S     | T     | V     | W     | Y     |
|---|-------|-------|-------|-------|-------|-------|-------|-------|-------|-------|-------|-------|-------|-------|-------|-------|-------|-------|-------|-------|
| A | 0.297 | 0.061 | 0.033 | 0.039 | 0.036 | 0.115 | 0.044 | 0.039 | 0.040 | 0.044 | 0.057 | 0.041 | 0.065 | 0.043 | 0.036 | 0.113 | 0.066 | 0.059 | 0.026 | 0.029 |
| C | 0.013 | 0.510 | 0.003 | 0.003 | 0.004 | 0.004 | 0.004 | 0.008 | 0.004 | 0.007 | 0.009 | 0.009 | 0.017 | 0.004 | 0.004 | 0.014 | 0.014 | 0.010 | 0.004 | 0.004 |
| D | 0.017 | 0.007 | 0.419 | 0.057 | 0.008 | 0.010 | 0.025 | 0.012 | 0.029 | 0.012 | 0.015 | 0.042 | 0.016 | 0.032 | 0.025 | 0.028 | 0.024 | 0.013 | 0.006 | 0.010 |
| E | 0.047 | 0.016 | 0.128 | 0.318 | 0.024 | 0.014 | 0.046 | 0.046 | 0.128 | 0.042 | 0.052 | 0.058 | 0.025 | 0.145 | 0.094 | 0.060 | 0.065 | 0.044 | 0.018 | 0.030 |
| F | 0.018 | 0.009 | 0.008 | 0.010 | 0.392 | 0.009 | 0.032 | 0.025 | 0.012 | 0.024 | 0.040 | 0.013 | 0.014 | 0.015 | 0.011 | 0.011 | 0.014 | 0.020 | 0.107 | 0.109 |
| G | 0.083 | 0.013 | 0.014 | 0.009 | 0.014 | 0.654 | 0.023 | 0.008 | 0.010 | 0.008 | 0.013 | 0.023 | 0.022 | 0.014 | 0.012 | 0.037 | 0.015 | 0.011 | 0.015 | 0.012 |
| H | 0.013 | 0.006 | 0.014 | 0.011 | 0.019 | 0.009 | 0.414 | 0.009 | 0.011 | 0.008 | 0.009 | 0.020 | 0.011 | 0.015 | 0.016 | 0.011 | 0.012 | 0.008 | 0.014 | 0.025 |
| I | 0.038 | 0.035 | 0.022 | 0.038 | 0.050 | 0.011 | 0.029 | 0.213 | 0.054 | 0.083 | 0.094 | 0.072 | 0.017 | 0.046 | 0.037 | 0.031 | 0.050 | 0.130 | 0.025 | 0.032 |
| K | 0.037 | 0.019 | 0.051 | 0.099 | 0.022 | 0.012 | 0.034 | 0.050 | 0.207 | 0.047 | 0.043 | 0.056 | 0.020 | 0.095 | 0.124 | 0.043 | 0.046 | 0.045 | 0.015 | 0.022 |
| L | 0.115 | 0.084 | 0.058 | 0.093 | 0.125 | 0.027 | 0.071 | 0.220 | 0.135 | 0.447 | 0.236 | 0.133 | 0.028 | 0.116 | 0.088 | 0.084 | 0.118 | 0.180 | 0.077 | 0.111 |
| M | 0.020 | 0.014 | 0.010 | 0.015 | 0.028 | 0.006 | 0.011 | 0.033 | 0.016 | 0.031 | 0.161 | 0.015 | 0.005 | 0.022 | 0.015 | 0.013 | 0.018 | 0.022 | 0.012 | 0.018 |
| N | 0.028 | 0.029 | 0.054 | 0.033 | 0.018 | 0.021 | 0.047 | 0.050 | 0.041 | 0.035 | 0.030 | 0.247 | 0.014 | 0.036 | 0.035 | 0.038 | 0.043 | 0.054 | 0.010 | 0.026 |
| P | 0.017 | 0.022 | 0.008 | 0.006 | 0.008 | 0.008 | 0.010 | 0.005 | 0.006 | 0.003 | 0.004 | 0.005 | 0.597 | 0.005 | 0.008 | 0.012 | 0.014 | 0.008 | 0.007 | 0.006 |
| Q | 0.030 | 0.014 | 0.042 | 0.086 | 0.021 | 0.014 | 0.036 | 0.033 | 0.073 | 0.031 | 0.046 | 0.037 | 0.014 | 0.221 | 0.061 | 0.032 | 0.038 | 0.028 | 0.015 | 0.019 |
| R | 0.026 | 0.012 | 0.035 | 0.058 | 0.017 | 0.012 | 0.041 | 0.028 | 0.100 | 0.025 | 0.033 | 0.038 | 0.023 | 0.064 | 0.318 | 0.031 | 0.037 | 0.025 | 0.016 | 0.022 |
| S | 0.072 | 0.041 | 0.034 | 0.032 | 0.014 | 0.033 | 0.025 | 0.021 | 0.030 | 0.021 | 0.024 | 0.036 | 0.029 | 0.029 | 0.027 | 0.303 | 0.065 | 0.026 | 0.011 | 0.026 |
| T | 0.046 | 0.047 | 0.032 | 0.039 | 0.019 | 0.014 | 0.029 | 0.036 | 0.035 | 0.032 | 0.037 | 0.045 | 0.037 | 0.037 | 0.035 | 0.071 | 0.274 | 0.044 | 0.015 | 0.021 |
| V | 0.065 | 0.052 | 0.026 | 0.041 | 0.044 | 0.016 | 0.032 | 0.146 | 0.054 | 0.076 | 0.070 | 0.088 | 0.032 | 0.044 | 0.037 | 0.045 | 0.069 | 0.257 | 0.016 | 0.034 |
| W | 0.005 | 0.003 | 0.002 | 0.003 | 0.040 | 0.004 | 0.009 | 0.005 | 0.003 | 0.005 | 0.007 | 0.003 | 0.005 | 0.004 | 0.004 | 0.003 | 0.004 | 0.003 | 0.535 | 0.023 |
| Y | 0.013 | 0.009 | 0.009 | 0.011 | 0.097 | 0.007 | 0.038 | 0.014 | 0.010 | 0.019 | 0.023 | 0.017 | 0.009 | 0.012 | 0.013 | 0.018 | 0.013 | 0.014 | 0.054 | 0.420 |

**Table S2.** Probability transition matrix (PTM) converted from BLOSUM62

|   | A     | C     | D     | E     | F     | G     | H     | I     | K     | L     | M     | N     | P     | Q     | R     | S     | T     | V     | W     | Y     |
|---|-------|-------|-------|-------|-------|-------|-------|-------|-------|-------|-------|-------|-------|-------|-------|-------|-------|-------|-------|-------|
| A | 0.304 | 0.068 | 0.042 | 0.058 | 0.036 | 0.082 | 0.044 | 0.049 | 0.060 | 0.047 | 0.056 | 0.046 | 0.059 | 0.059 | 0.048 | 0.115 | 0.077 | 0.073 | 0.032 | 0.042 |
| C | 0.021 | 0.470 | 0.007 | 0.007 | 0.011 | 0.010 | 0.009 | 0.016 | 0.008 | 0.015 | 0.015 | 0.010 | 0.009 | 0.009 | 0.007 | 0.018 | 0.018 | 0.018 | 0.011 | 0.010 |
| D | 0.028 | 0.016 | 0.385 | 0.088 | 0.016 | 0.033 | 0.035 | 0.018 | 0.041 | 0.015 | 0.018 | 0.081 | 0.031 | 0.047 | 0.030 | 0.048 | 0.036 | 0.018 | 0.012 | 0.018 |
| E | 0.044 | 0.017 | 0.100 | 0.323 | 0.020 | 0.028 | 0.057 | 0.020 | 0.077 | 0.022 | 0.030 | 0.054 | 0.040 | 0.112 | 0.057 | 0.056 | 0.044 | 0.025 | 0.022 | 0.029 |
| F | 0.020 | 0.019 | 0.013 | 0.015 | 0.358 | 0.015 | 0.029 | 0.042 | 0.015 | 0.051 | 0.044 | 0.016 | 0.013 | 0.015 | 0.017 | 0.019 | 0.021 | 0.033 | 0.060 | 0.122 |
| G | 0.088 | 0.035 | 0.053 | 0.040 | 0.028 | 0.571 | 0.041 | 0.023 | 0.049 | 0.024 | 0.033 | 0.072 | 0.040 | 0.045 | 0.037 | 0.075 | 0.048 | 0.028 | 0.035 | 0.029 |
| H | 0.014 | 0.009 | 0.017 | 0.024 | 0.016 | 0.012 | 0.338 | 0.008 | 0.019 | 0.010 | 0.015 | 0.031 | 0.012 | 0.029 | 0.023 | 0.018 | 0.014 | 0.008 | 0.011 | 0.045 |
| I | 0.039 | 0.041 | 0.021 | 0.020 | 0.059 | 0.017 | 0.020 | 0.248 | 0.025 | 0.105 | 0.092 | 0.020 | 0.024 | 0.024 | 0.022 | 0.027 | 0.048 | 0.150 | 0.025 | 0.039 |
| K | 0.043 | 0.020 | 0.044 | 0.073 | 0.019 | 0.033 | 0.044 | 0.022 | 0.267 | 0.024 | 0.035 | 0.053 | 0.039 | 0.087 | 0.116 | 0.052 | 0.044 | 0.026 | 0.020 | 0.030 |
| L | 0.055 | 0.059 | 0.026 | 0.034 | 0.106 | 0.026 | 0.035 | 0.156 | 0.039 | 0.349 | 0.183 | 0.029 | 0.034 | 0.044 | 0.044 | 0.039 | 0.061 | 0.121 | 0.052 | 0.064 |
| M | 0.017 | 0.015 | 0.008 | 0.012 | 0.024 | 0.009 | 0.014 | 0.035 | 0.015 | 0.048 | 0.156 | 0.011 | 0.010 | 0.021 | 0.015 | 0.014 | 0.019 | 0.030 | 0.015 | 0.017 |
| N | 0.024 | 0.016 | 0.064 | 0.037 | 0.015 | 0.035 | 0.050 | 0.013 | 0.039 | 0.013 | 0.019 | 0.291 | 0.021 | 0.041 | 0.035 | 0.050 | 0.040 | 0.015 | 0.011 | 0.020 |
| P | 0.032 | 0.016 | 0.026 | 0.029 | 0.012 | 0.021 | 0.020 | 0.017 | 0.030 | 0.016 | 0.018 | 0.022 | 0.552 | 0.028 | 0.021 | 0.032 | 0.030 | 0.019 | 0.012 | 0.016 |
| Q | 0.026 | 0.012 | 0.031 | 0.065 | 0.011 | 0.018 | 0.040 | 0.013 | 0.053 | 0.016 | 0.029 | 0.034 | 0.022 | 0.212 | 0.048 | 0.033 | 0.027 | 0.016 | 0.017 | 0.021 |
| R | 0.031 | 0.016 | 0.029 | 0.049 | 0.019 | 0.023 | 0.047 | 0.018 | 0.106 | 0.024 | 0.032 | 0.044 | 0.025 | 0.072 | 0.340 | 0.039 | 0.035 | 0.021 | 0.020 | 0.028 |
| S | 0.087 | 0.044 | 0.054 | 0.056 | 0.026 | 0.053 | 0.043 | 0.026 | 0.055 | 0.025 | 0.035 | 0.073 | 0.045 | 0.057 | 0.045 | 0.227 | 0.095 | 0.033 | 0.023 | 0.033 |
| T | 0.054 | 0.041 | 0.038 | 0.041 | 0.026 | 0.032 | 0.031 | 0.043 | 0.044 | 0.036 | 0.044 | 0.054 | 0.038 | 0.044 | 0.037 | 0.089 | 0.266 | 0.054 | 0.024 | 0.032 |
| V | 0.067 | 0.054 | 0.024 | 0.031 | 0.054 | 0.024 | 0.024 | 0.174 | 0.033 | 0.095 | 0.091 | 0.027 | 0.032 | 0.034 | 0.030 | 0.041 | 0.071 | 0.266 | 0.027 | 0.047 |
| W | 0.006 | 0.006 | 0.003 | 0.005 | 0.019 | 0.006 | 0.006 | 0.006 | 0.005 | 0.008 | 0.009 | 0.004 | 0.004 | 0.007 | 0.006 | 0.005 | 0.006 | 0.005 | 0.534 | 0.030 |
| Y | 0.018 | 0.015 | 0.012 | 0.017 | 0.094 | 0.012 | 0.061 | 0.021 | 0.018 | 0.024 | 0.024 | 0.017 | 0.012 | 0.021 | 0.019 | 0.019 | 0.019 | 0.022 | 0.072 | 0.334 |

**Table S3.** The non-redundant protein group division for five-fold cross-validation, in which proteins in different groups have a sequence identity below 30%.

| <b>#Groups</b> | <b>Protein IDs in SKEMPI</b>                                                                                                                                                   |
|----------------|--------------------------------------------------------------------------------------------------------------------------------------------------------------------------------|
| 1              | 1CSOEI 1CT0EI 1CT2EI 1CT4EI 1SGDEI 1SGEEI 1SGNEI 1SGPEI 1SGQEI 1SGYEI 2NU0EI 2NU1EI 2NU2EI 2NU4EI 2SGPEI 2SGQEI 3SGBEI 1IARAB 1XD3AB 1F47AB 1ACBEI 1H9DAB 2HRKAB 3BP8AC 2O0BAB |
| 2              | 1JTGAB 1S0WAC 2G2UAB 2G2WAB 1A4YAB 1Z7XWX 2GOXAB 2NOJAB 3D5RAC 3D5SAC 1KACAB 1P69AB 1P6AAB 3BK3AC 1JCKAB 1SBBAB 4CPAAI 1S1QAB 2B42AB 1E96AB 2I26NL                             |
| 3              | 1PPFEI 1CSEEI 1SBNEI 1TM1EI 1TM3EI 1TM4EI 1TM5EI 1TM7EI 1TMGEI 1TO1EI 1Y1KEI 1Y33EI 1Y34EI 1Y3BEI 1Y4AEI 1GC1GC 2SICEI 2O3BAB 1FC2CD 2BTFAP 1EFNAB 2A9KAB                      |
| 4              | 1R0REI 1EAWAB 2FTLEI 3BTDEI 3BTEEI 3BTFEI 3BTGEI 3BTHEI 3BTMEI 3BTQEI 3BTTEI 3BTWEI 1AK4AD 1M9EAD 2J0TAD 1FFWAB 1MAHAF 1UUZAD 1SMFEI 2AJFAE 2J1KCT                             |
| 5              | 1B2SAD 1B2UAD 1B3SAD 1BRSAD 1X1XAD 1EMVAB 2VLNAB 2VLOAB 2VLQAB 2WPTAB 1A22AB 2B0ZAB 2B10AB 2B11AB 2B12AB 2PCBAB 2PCCAB 1KTZAB 1LFDAB 1FCCAC 1GL0EI 1GL1AI 1HE8AB 2HLEAB 2I9BAE |

**Table S4.**  $\Delta\Delta G$  calculations based on low-resolution complex structure models built from unbound monomer structures. The ZEMu results are collected from the Supplementary Information of the ZEMu paper (Dourado DF, Flores SC. Modeling and fitting protein-protein complexes to predict change of binding energy. Sci Rep. 2016;6:25406).

| PDBID          | Mutations     | #mutation | $\Delta\Delta G$ (kcal/mol) |       |           |
|----------------|---------------|-----------|-----------------------------|-------|-----------|
|                |               |           | Exp.                        | ZEMu  | BindProfX |
| 1tgj_1m9z_1ktz | VA92I         | 1         | 0.24                        | 0.5   | 0.942     |
| 1tgj_1m9z_1ktz | RA25K         | 1         | 1.15                        | 0.87  | 1.205     |
| 1tgj_1m9z_1ktz | RA94K         | 1         | 2.2                         | -1.76 | 1.205     |
| 1tgj_1m9z_1ktz | RA25A         | 1         | 1.48                        | 0.46  | 1.6       |
| 1tgj_1m9z_1ktz | RA94A         | 1         | 2.88                        | 0.62  | 1.6       |
| 1tgj_1m9z_1ktz | LB27A         | 1         | 2.27                        | 1.42  | 2.044     |
| 1tgj_1m9z_1ktz | FB30A         | 1         | 3.43                        | 0.33  | 1.879     |
| 1tgj_1m9z_1ktz | DB32A         | 1         | 1.97                        | 0.3   | 0         |
| 1tgj_1m9z_1ktz | DB32N         | 1         | 2.45                        | 0.42  | 0         |
| 1tgj_1m9z_1ktz | SB49A         | 1         | 0.77                        | 0.01  | 1.196     |
| 1tgj_1m9z_1ktz | IB50A         | 1         | 2.34                        | 0.89  | 1.173     |
| 1tgj_1m9z_1ktz | TB51A         | 1         | 1.96                        | 0.13  | 1.296     |
| 1tgj_1m9z_1ktz | SB52A         | 1         | 0.66                        | -2.27 | 1.196     |
| 1tgj_1m9z_1ktz | SB52L         | 1         | 4.48                        | NA    | 1.325     |
| 1tgj_1m9z_1ktz | IB53A         | 1         | 1.82                        | 0.89  | 1.173     |
| 1tgj_1m9z_1ktz | EB55A         | 1         | 1.66                        | 0.12  | 1.583     |
| 1tgj_1m9z_1ktz | VB77A         | 1         | 0.86                        | 0.01  | 1.254     |
| 1tgj_1m9z_1ktz | DB118A        | 1         | 1.26                        | 0.24  | 0.808     |
| 1tgj_1m9z_1ktz | EB119A        | 1         | 1.94                        | 0.47  | 1.583     |
| 1tgj_1m9z_1ktz | EB119Q        | 1         | 2.07                        | 0.07  | 1.374     |
| 1tgj_1m9z_1ktz | NB47A         | 1         | 0.73                        | 0     | 0         |
| 1tgj_1m9z_1ktz | VB62A         | 1         | 1.09                        | 0     | 0         |
| 1tgj_1m9z_1ktz | EB75A         | 1         | 1.53                        | 0.21  | 0         |
| 1tgj_1m9z_1ktz | HB79A         | 1         | 0.74                        | -0.04 | 0         |
| 1tgj_1m9z_1ktz | FB110A        | 1         | 1.38                        | 0     | 0         |
| 1tgj_1m9z_1ktz | MB112A        | 1         | 1.32                        | 0     | 0         |
| 1tgj_1m9z_1ktz | IB125A        | 1         | 0.99                        | 0     | 0         |
| 1zg4_3gmu_1jtg | KB74A,YA105A  | 2         | 3.32                        | 0.2   | 1.687     |
| 1zg4_3gmu_1jtg | NA100A        | 1         | -0.46                       | 1.24  | 1.15      |
| 1zg4_3gmu_1jtg | NA100A,WB112A | 2         | 2.79                        | -0.16 | 3.94      |
| 1zg4_3gmu_1jtg | NA100A,FB142A | 2         | 2.29                        | 1     | 3.395     |
| 1zg4_3gmu_1jtg | NA100A,HB148A | 2         | 2.1                         | -1.1  | 3.435     |
| 1zg4_3gmu_1jtg | NA100A,WB150A | 2         | 4.35                        | 0.4   | 3.94      |
| 1zg4_3gmu_1jtg | NA100A,RB160A | 2         | 1.58                        | 0.35  | 3.127     |
| 1zg4_3gmu_1jtg | NA100A,WB162A | 2         | 2.1                         | -1.15 | 3.94      |
| 1zg4_3gmu_1jtg | NA100A,KB74A  | 2         | 3.51                        | -1.02 | 1.15      |

|                |                             |   |       |       |       |
|----------------|-----------------------------|---|-------|-------|-------|
| 1zg4_3gmu_1jtg | VA103A                      | 1 | 1.91  | 0.02  | 1.641 |
| 1zg4_3gmu_1jtg | VA103A,FB142A               | 2 | 4.51  | 2.73  | 3.886 |
| 1zg4_3gmu_1jtg | VA103A,RB160A               | 2 | 4.35  | 0.63  | 3.618 |
| 1zg4_3gmu_1jtg | VA103A,WB162A               | 2 | 4.23  | -1.16 | 4.431 |
| 1zg4_3gmu_1jtg | EA104A                      | 1 | 1.55  | -2.25 | 0.774 |
| 1zg4_3gmu_1jtg | EA104A,SB113A               | 2 | 1.86  | -1.62 | 0.774 |
| 1zg4_3gmu_1jtg | EA110A,SB113A,SB71A         | 3 | 5.04  | 1.28  | 3.535 |
| 1zg4_3gmu_1jtg | EA104K                      | 1 | 4.23  | NA    | 0.726 |
| 1zg4_3gmu_1jtg | PA107A                      | 1 | -0.38 | -1.36 | 2.82  |
| 1zg4_3gmu_1jtg | PA107A,HB41A                | 2 | 2.65  | -2.23 | 5.106 |
| 1zg4_3gmu_1jtg | PA107A,YB53A                | 2 | 2.39  | -1.51 | 5.197 |
| 1zg4_3gmu_1jtg | EA110A                      | 1 | 4.06  | -1.58 | 1.96  |
| 1zg4_3gmu_1jtg | EA110A,SB113A               | 2 | 4.56  | 1.41  | 1.96  |
| 1zg4_3gmu_1jtg | EA110A,SB113A,SB71A         | 3 | 5.04  | -0.08 | 3.535 |
| 1zg4_3gmu_1jtg | EA110A,SB71A                | 2 | 5.02  | 1.08  | 3.535 |
| 1zg4_3gmu_1jtg | MA129A                      | 1 | 0.74  | 1.09  | 0.864 |
| 1zg4_3gmu_1jtg | MA129A,SB113A,SB71A         | 3 | 1.67  | 2.89  | 2.439 |
| 1zg4_3gmu_1jtg | MA129A,FB36A                | 2 | 3.63  | 1.89  | 3.109 |
| 1zg4_3gmu_1jtg | MA129A,YB53A                | 2 | 3.61  | 2.17  | 3.241 |
| 1zg4_3gmu_1jtg | EA168A                      | 1 | -0.07 | -0.14 | 1.96  |
| 1zg4_3gmu_1jtg | EA168A,WB112A               | 2 | 2.79  | 1.09  | 4.75  |
| 1zg4_3gmu_1jtg | EA168A,FB142A               | 2 | 2.58  | 2.41  | 4.205 |
| 1zg4_3gmu_1jtg | EA168A,WB150A               | 2 | 4.11  | 0.62  | 4.75  |
| 1zg4_3gmu_1jtg | EA168A,RB160A               | 2 | 2.32  | 1.18  | 3.937 |
| 1zg4_3gmu_1jtg | EA168A,WB162A               | 2 | 2.08  | 0.51  | 4.75  |
| 1zg4_3gmu_1jtg | EA168A,KB74A                | 2 | 4.06  | -1.01 | 1.96  |
| 1zg4_3gmu_1jtg | VA216A                      | 1 | -0.41 | 0.68  | 1.129 |
| 1zg4_3gmu_1jtg | SA235A,SA130A,KA234A        | 3 | 1.85  | 0.51  | 1.576 |
| 1zg4_3gmu_1jtg | QA99A                       | 1 | 0.43  | 0.36  | 1.128 |
| 1zg4_3gmu_1jtg | QA99A,WB112A                | 2 | 3.54  | 1.41  | 3.918 |
| 1zg4_3gmu_1jtg | QA99A,FB142A                | 2 | 2.82  | 2.95  | 3.373 |
| 1zg4_3gmu_1jtg | QA99A,HB148A                | 2 | 3.2   | 0.83  | 3.414 |
| 1zg4_3gmu_1jtg | QA99A,WB150A                | 2 | 3.82  | 1.54  | 3.918 |
| 1zg4_3gmu_1jtg | QA99A,RB160A                | 2 | 3.75  | 2.65  | 3.105 |
| 1zg4_3gmu_1jtg | QA99A,WB162A                | 2 | 2.89  | 1.68  | 3.918 |
| 1zg4_3gmu_1jtg | QA99A,KB74A                 | 2 | 4.11  | -1.76 | 1.128 |
| 1zg4_3gmu_1jtg | WB112A                      | 1 | 3.01  | 0.87  | 2.79  |
| 1zg4_3gmu_1jtg | SB113A                      | 1 | -0.17 | -0.21 | 0     |
| 1zg4_3gmu_1jtg | FB142A,EA104A               | 2 | 2.75  | 0.77  | 3.02  |
| 1zg4_3gmu_1jtg | FB142A,YB143A,EA104A,YA105A | 4 | 2.84  | 0.91  | 7.084 |
| 1zg4_3gmu_1jtg | HB148A                      | 1 | 2.75  | 0.11  | 2.286 |
| 1zg4_3gmu_1jtg | WB150A                      | 1 | 4.25  | 0.78  | 2.79  |
| 1zg4_3gmu_1jtg | RB160A                      | 1 | 2.22  | 0.55  | 1.977 |

|                         |              |   |       |       |       |
|-------------------------|--------------|---|-------|-------|-------|
| 1zg4_3gmu_1jtg          | WB162A       | 1 | 2.34  | 1.43  | 2.79  |
| 1zg4_3gmu_1jtg          | FB36A        | 1 | 3.2   | 2.11  | 2.245 |
| 1zg4_3gmu_1jtg          | HB41A        | 1 | 3.25  | 0.47  | 2.286 |
| 1zg4_3gmu_1jtg          | YB53A        | 1 | 2.08  | 0.56  | 2.377 |
| 1zg4_3gmu_1jtg          | SB71A        | 1 | 0.36  | 1.57  | 1.576 |
| 2jwd_4dz8_1fc2          | IC135W       | 1 | 0.58  | -1.17 | 0     |
| 2jwd_4dz8_1fc2          | FC149W       | 1 | -0.04 | -0.01 | 0     |
| 2jwd_4dz8_1fc2          | LC163W       | 1 | 2.18  | 0     | 0     |
| 2jwd_4dz8_1fc2          | LC136D       | 1 | 1.23  | 0.41  | 1.82  |
| 2jwd_4dz8_1fc2          | NC147A       | 1 | 0.41  | 0.14  | 0.896 |
| 2jwd_4dz8_1fc2          | FC149A       | 1 | 3.14  | 0.33  | 0     |
| 2jwd_4dz8_1fc2          | IC150A       | 1 | 0     | 0.11  | 0     |
| 2jwd_4dz8_1fc2          | KC154A       | 1 | 0     | 1.47  | 0     |
| 3r99_1nmi_2pcc          | DA34A        | 1 | -0.9  | 2.53  | 1.993 |
| 3r99_1nmi_2pcc          | VA197A       | 1 | 2.1   | 0.44  | 1.254 |
| 3r99_1nmi_2pcc          | EA290A       | 1 | 6.2   | 1.02  | 1.583 |
| 3r99_1nmi_2pcc          | KB87A        | 1 | 0.9   | 2.12  | 1.141 |
| 3r99_1nmi_2pcc          | KB87A,DA34A  | 2 | 0.2   | 0.89  | 3.134 |
| 3r99_1nmi_2pcc          | KB87A,VA197A | 2 | 1.5   | 2.19  | 2.396 |
| 3r99_1nmi_2pcc          | KB72A        | 1 | 0.3   | -0.61 | 1.141 |
| 3r99_1nmi_2pcc          | KB72A,VA197A | 2 | 2.8   | -0.1  | 2.396 |
| 3r99_1nmi_2pcc          | KB72A,EA290A | 2 | 1.1   | -0.01 | 2.724 |
| 3r99_1nmi_2pcc          | AB81G        | 1 | 1.9   | -0.29 | 0.71  |
| 3r99_1nmi_2pcc          | AB81G,DA34A  | 2 | -0.1  | 0.41  | 2.703 |
| 3r99_1nmi_2pcc          | AB81G,VA197A | 2 | 2.1   | 0.36  | 1.964 |
| Correlation coefficient |              |   |       | 0.118 | 0.454 |
